# Supplementary material
Source: PubMed Central journal article supplement (PMC5294215)

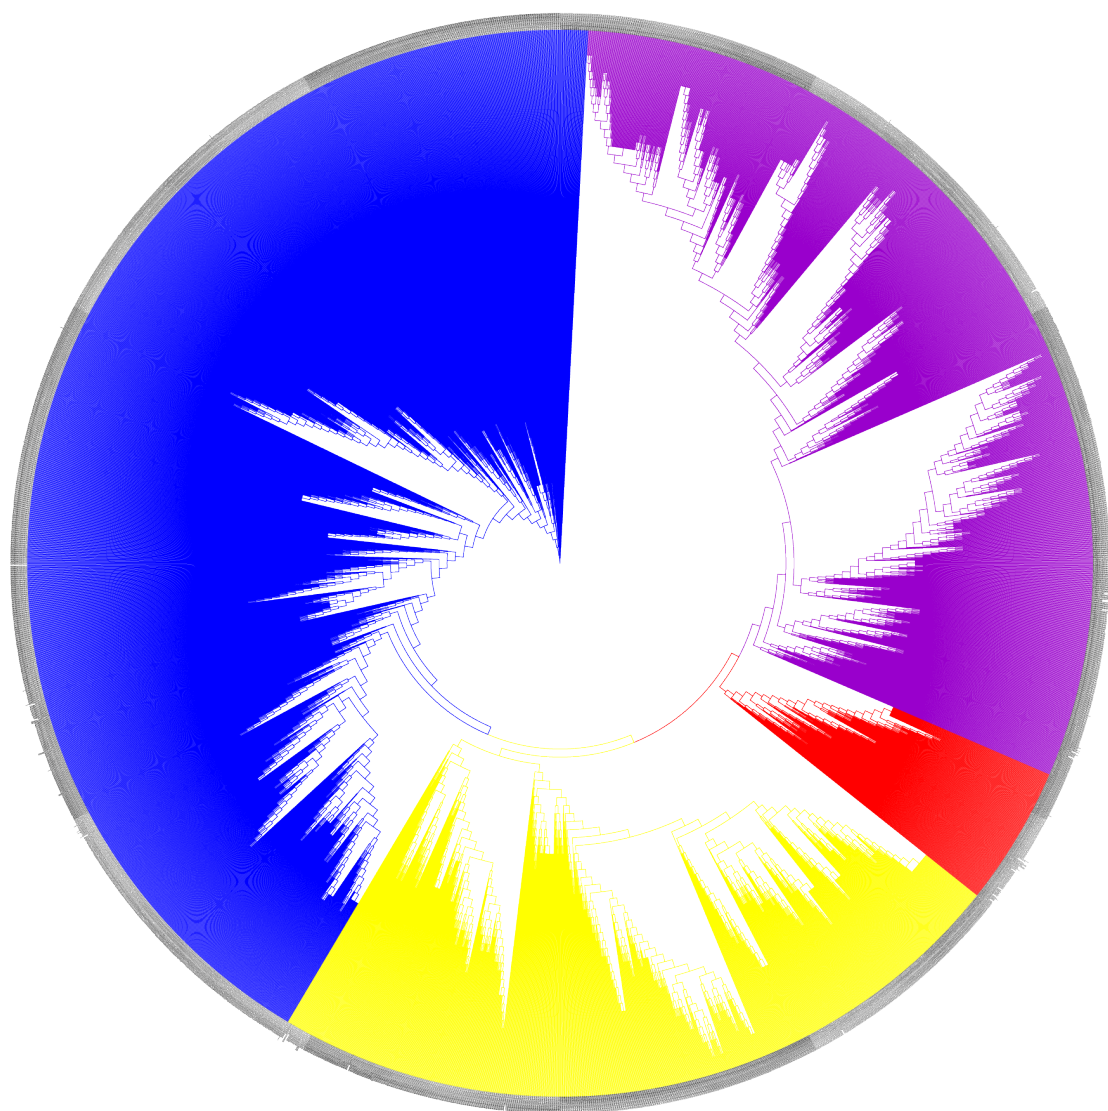

Supplement: 10.1074_M116.064873_mcp.M116.064873-2.pdf [file 10.1074_M116.064873_mcp.M116.064873-2.pdf]
